# Supplementary material
Source: PubMed Central journal article supplement (PMC6641716)
Supplement: ao7b00830_si_001.pdf [file ao7b00830_si_001.pdf]

# Special Magnetic Catalyst with Lignin-Reduced Au-Pd Nanoalloy

## Supporting Information

Guocheng Han<sup>1,#</sup>, Xiaoyun Li<sup>1,2,#</sup>, Jiaming Li<sup>1</sup>, Xiaoying Wang<sup>1,2\*</sup>, Yu Shrike Zhang<sup>2\*</sup>, Runcang Sun<sup>1</sup>

<sup>1</sup> *State Key Laboratory of Pulp and Paper Engineering, South China University of Technology, Guangzhou 510640, China*

<sup>2</sup> *Division of Biomedical Engineering, Department of Medicine, Brigham and Women's Hospital, Harvard Medical School, Boston 02139, United States*

# Co-first author with the same contribution to this work

\*Corresponding authors: Xiaoying Wang, [xyw@scut.edu.cn](mailto:xyw@scut.edu.cn); Yu Shrike Zhang [yszhang@research.bwh.harvard.edu](mailto:yszhang@research.bwh.harvard.edu)

## Supporting information

**Figure S1** FT-IR spectra of (a) original lignin, (b) lignin-Au<sub>2.0</sub>Pd<sub>1.0</sub> composites, (c) lignin-Au<sub>1.0</sub>Pd<sub>1.0</sub> composites, and (d) lignin-Au<sub>0.5</sub>Pd<sub>1.0</sub> composites. The results reveal that O–H and C=O units within the lignin structure may contribute to the reduction of metal salt to nanoalloy.

**Figure S2** Time-dependent UV-vis spectra of the reduction of 4-NP by NaBH<sub>4</sub> in the presence of single-component (a) AuNPs and (b) PdNPs.

**Figure S3** Size distribution of (a) Au<sub>0.5</sub>Pd<sub>1.0</sub>, (b) Au<sub>1.0</sub>Pd<sub>1.0</sub> and (c) Au<sub>2.0</sub>Pd<sub>1.0</sub>.

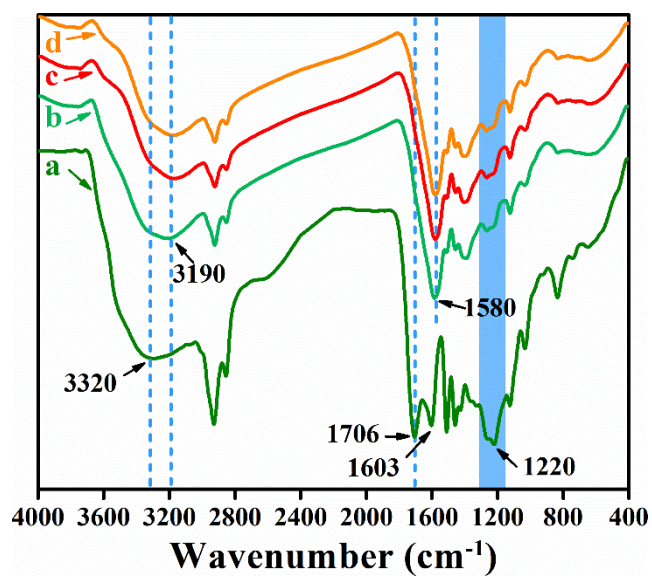

**Figure S1** FT-IR spectra of (a) original lignin, (b) lignin-Au<sub>2.0</sub>Pd<sub>1.0</sub> composites, (c) lignin-Au<sub>1.0</sub>Pd<sub>1.0</sub> composites, and (d) lignin-Au<sub>0.5</sub>Pd<sub>1.0</sub> composites. The results reveal that O–H and C=O units within the lignin structure may contribute to the reduction of metal salt to nanoalloy.

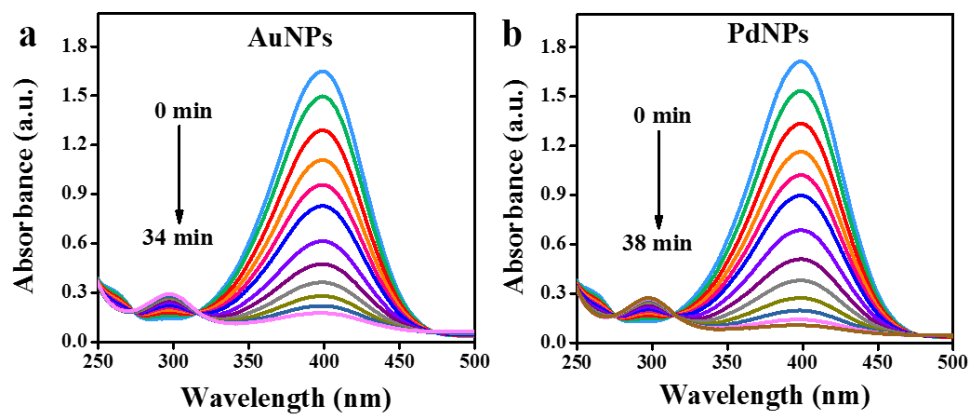

**Figure S2** Time-dependent UV-vis spectra of the reduction of 4-NP by NaBH<sub>4</sub> in the presence of single-component (a) AuNPs and (b) PdNPs.

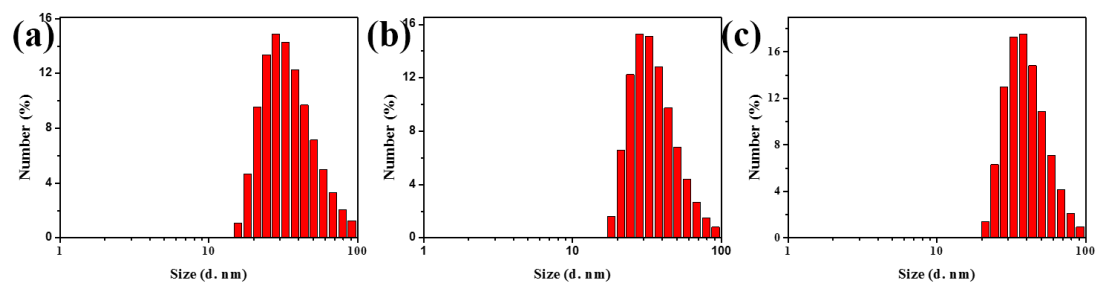

**Figure S3** Size distribution of (a)  $\text{Au}_{0.5}\text{Pd}_{1.0}$ , (b)  $\text{Au}_{1.0}\text{Pd}_{1.0}$  and (c)  $\text{Au}_{2.0}\text{Pd}_{1.0}$ .
